# Supplementary material for: Catalysis by Bidentate Iodine(III)-Based Halogen Donors: Surpassing the Activity of Strong Lewis Acids
Source: PubMed Central journal article supplement (PMC9132362; doi:10.1021/acs.joc.1c00534), 2021-03-25
Supplement: jo1c00534_si_001.pdf [file jo1c00534_si_001.pdf]

# Catalysis by Bidentate Iodine(III)-based Halogen donors: Surpassing the activity of strong Lewis acids

Susana Portela, Jorge J. Cabrera-Trujillo and Israel Fernández\*

Departamento de Química Orgánica I and Centro de Innovación en Química Avanzada (ORFEO-CINQA), Facultad de Ciencias Químicas, Universidad Complutense de Madrid, 28040-Madrid (Spain).

E-mail: israel@quim.ucm.es

## Contents:

|                                            |    |
|--------------------------------------------|----|
| 1. Figure S1.....                          | S2 |
| 2. Figure S2.....                          | S3 |
| 3. Cartesian coordinates and energies..... | S4 |

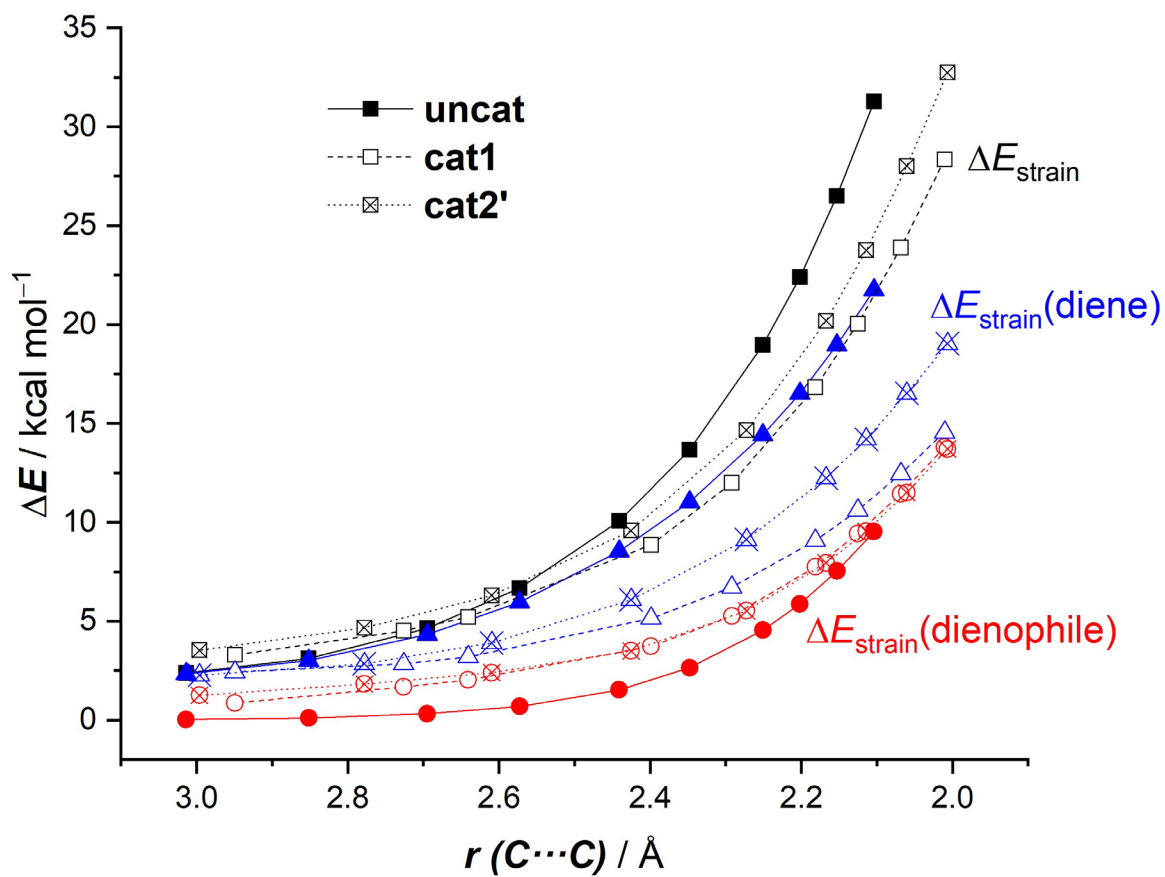

**Figure S1.** Decomposition of the strain energy associated with the deformation of the diene and dienophile of the Diels-Alder reactions between cyclohexadiene and uncoordinated, **cat1**-, **cat2'**-bonded methyl vinyl ketone complexes projected onto the shorter C···C bond-forming distance.

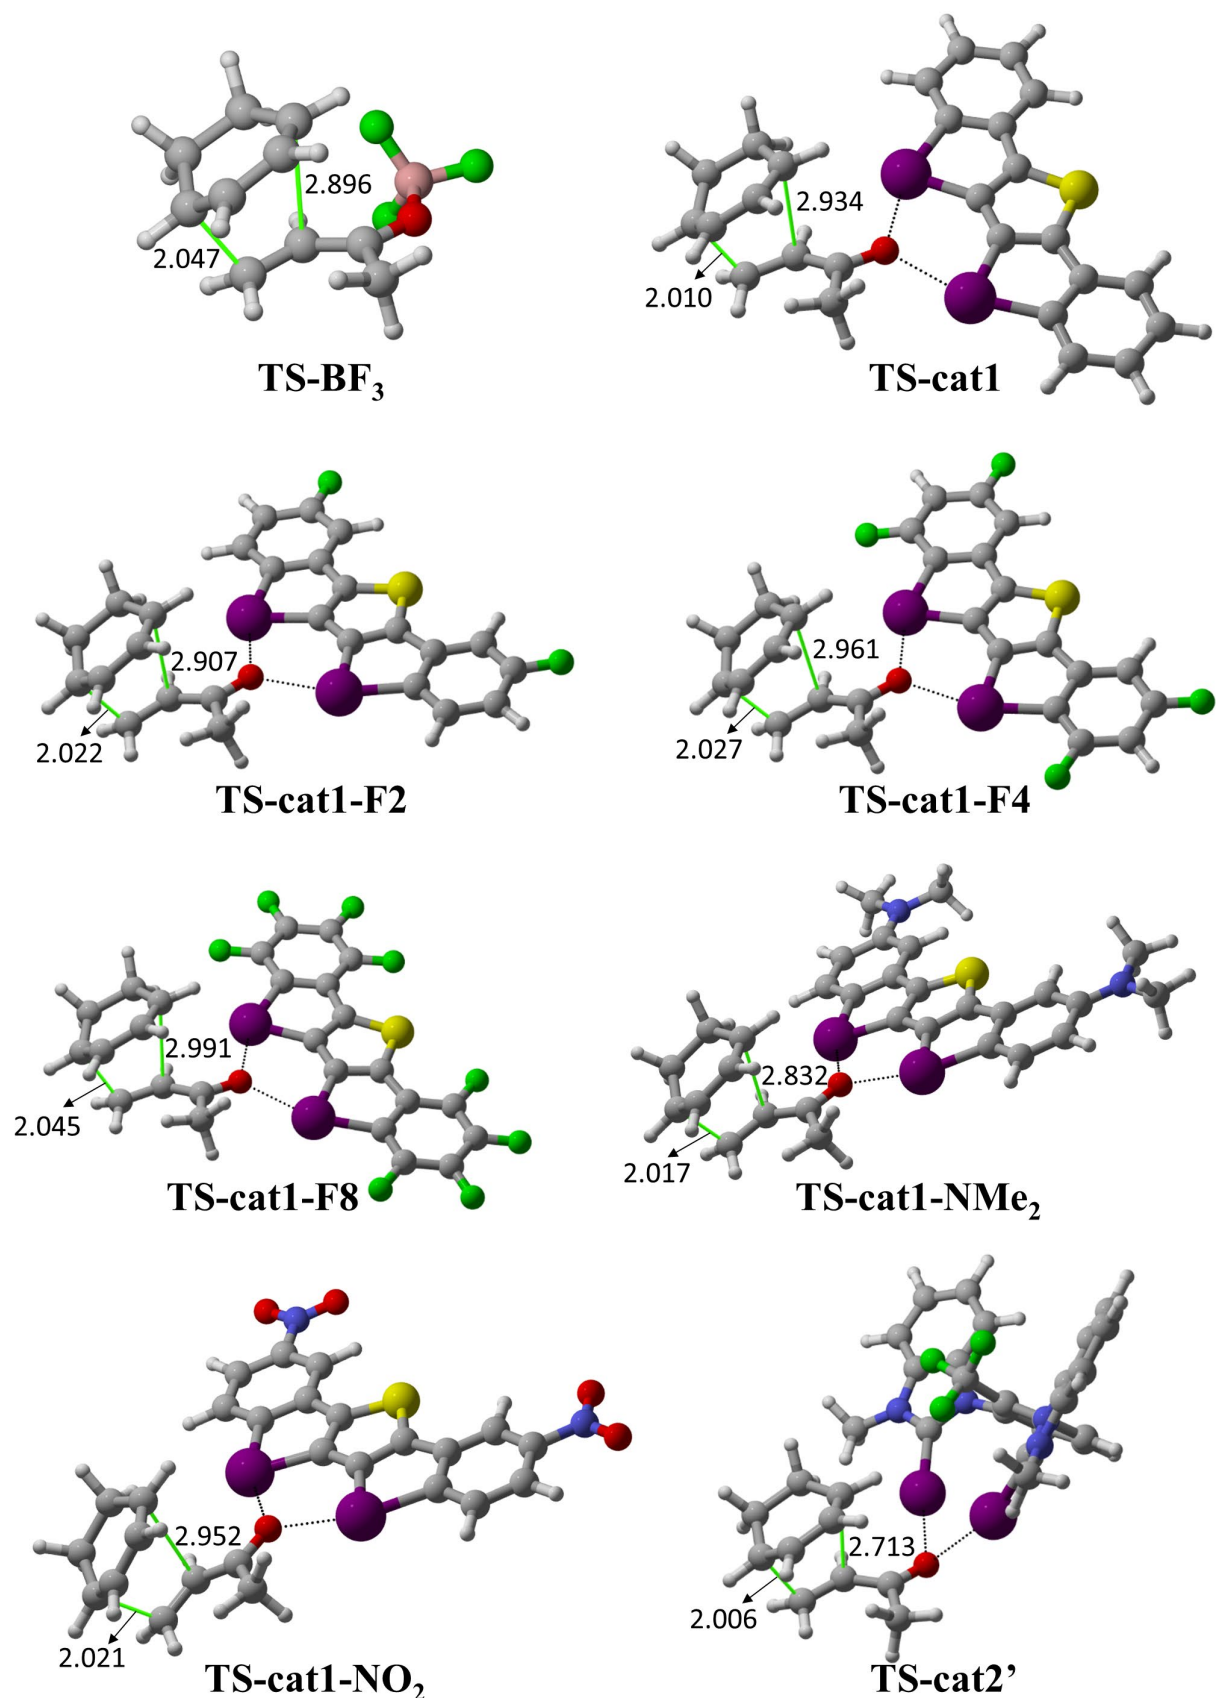

**Figure S2.** Representation of the optimized transition states (PCM(DCM)-B3LYP-D3/def2-SVP level) for the catalyzed Diels-Alder reactions between cyclohexadiene and methyl vinyl ketone. Bond distances are given in angstroms.

Cartesian coordinates (in Å) and total energies of all the stationary points discussed in the text. All calculations have been performed at the PCM(DCM)-B3LYP-D3/def2-TZVPP//PCM(DCM)-B3LYP-D3/def2-SVP level.

**Cyclohexadiene:** E= -233.520015028 (i = 0)

|   |              |              |              |
|---|--------------|--------------|--------------|
| C | -0.110675000 | 1.426692000  | -0.065100000 |
| C | 1.194877000  | 0.729988000  | 0.240734000  |
| C | 1.194866000  | -0.730007000 | -0.240734000 |
| C | -0.110698000 | -1.426690000 | 0.065100000  |
| C | -1.261694000 | -0.726979000 | 0.105563000  |
| C | -1.261682000 | 0.726999000  | -0.105564000 |
| H | 1.350732000  | -0.758903000 | -1.339365000 |
| H | 2.045456000  | 1.276131000  | -0.196894000 |
| H | 1.350745000  | 0.758885000  | 1.339365000  |
| H | -0.113859000 | 2.514670000  | -0.185029000 |
| H | -0.113899000 | -2.514667000 | 0.185032000  |
| H | -2.217299000 | -1.233046000 | 0.272951000  |
| H | -2.217279000 | 1.233082000  | -0.272951000 |
| H | 2.045436000  | -1.276164000 | 0.196892000  |

**1, Methyl vinyl ketone (MVK):** E= -231.345421666 (i = 0)

|   |              |              |              |
|---|--------------|--------------|--------------|
| C | -0.871976000 | -0.637105000 | 0.000181000  |
| H | -0.985906000 | -1.726410000 | 0.000485000  |
| C | -1.943770000 | 0.167601000  | -0.000129000 |
| H | -2.958108000 | -0.241204000 | -0.000070000 |
| H | -1.855743000 | 1.257719000  | -0.000426000 |
| C | 0.548140000  | -0.186985000 | 0.000012000  |
| C | 0.850995000  | 1.297983000  | 0.000080000  |
| H | 0.414230000  | 1.784682000  | -0.886623000 |
| H | 0.414665000  | 1.784365000  | 0.887171000  |
| H | 1.938808000  | 1.443040000  | -0.000226000 |
| O | 1.441465000  | -1.018895000 | -0.000147000 |

**Complex 1-BF<sub>3</sub>:** E= -556.088498994 (i = 0)

|   |              |              |              |
|---|--------------|--------------|--------------|
| C | -1.404558000 | -0.871751000 | 0.000015000  |
| H | -0.595040000 | -1.601319000 | 0.000144000  |
| C | -2.688733000 | -1.271347000 | -0.000035000 |
| H | -2.936182000 | -2.336027000 | 0.000173000  |
| H | -3.529734000 | -0.573385000 | -0.000061000 |
| C | -1.012530000 | 0.537130000  | -0.000177000 |
| C | -2.022448000 | 1.639355000  | 0.000034000  |
| H | -2.670520000 | 1.560552000  | -0.886523000 |
| H | -2.670035000 | 1.560407000  | 0.886947000  |
| H | -1.511319000 | 2.608901000  | -0.000024000 |
| O | 0.194439000  | 0.878868000  | -0.000429000 |
| B | 1.481007000  | -0.085137000 | 0.000020000  |
| F | 1.384698000  | -0.838081000 | 1.146571000  |
| F | 1.384869000  | -0.839075000 | -1.145893000 |
| F | 2.532867000  | 0.785521000  | -0.000273000 |

**Complex 1-cat1:** E= -1839.44481678 (i = 0)

|   |              |             |              |
|---|--------------|-------------|--------------|
| C | -1.416775000 | 4.404069000 | 0.449113000  |
| H | -2.200188000 | 3.732351000 | 0.809938000  |
| C | -1.614925000 | 5.732749000 | 0.483492000  |
| H | -2.553503000 | 6.143390000 | 0.864680000  |
| H | -0.868301000 | 6.453561000 | 0.142059000  |
| C | -0.187984000 | 3.748164000 | -0.017515000 |
| C | 1.026294000  | 4.547144000 | -0.396758000 |
| H | 0.777614000  | 5.532103000 | -0.809668000 |

|   |              |              |              |
|---|--------------|--------------|--------------|
| H | 1.632962000  | 4.709134000  | 0.511218000  |
| H | 1.628220000  | 3.993091000  | -1.128784000 |
| O | -0.141587000 | 2.504222000  | -0.055607000 |
| C | -2.521308000 | -2.252029000 | 0.007988000  |
| C | -3.364887000 | -1.122088000 | -0.037403000 |
| C | -4.750073000 | -1.184698000 | -0.048751000 |
| C | -5.330195000 | -2.459764000 | -0.015102000 |
| C | -4.529084000 | -3.609045000 | 0.028883000  |
| C | -3.137774000 | -3.515332000 | 0.040723000  |
| C | -1.098735000 | -1.969724000 | 0.015469000  |
| H | -5.370706000 | -0.287630000 | -0.082300000 |
| H | -6.418313000 | -2.549005000 | -0.023380000 |
| H | -4.999041000 | -4.593916000 | 0.054969000  |
| H | -2.524069000 | -4.418197000 | 0.075757000  |
| C | -0.640068000 | -0.663342000 | -0.018407000 |
| C | 3.530207000  | -0.661369000 | 0.023151000  |
| C | 2.842155000  | -1.892372000 | 0.052360000  |
| C | 3.616500000  | -3.064325000 | 0.107409000  |
| C | 5.007781000  | -2.976044000 | 0.134351000  |
| C | 5.652067000  | -1.731529000 | 0.111418000  |
| C | 4.911382000  | -0.543265000 | 0.055776000  |
| C | 0.768253000  | -0.568040000 | -0.013339000 |
| C | 1.395704000  | -1.801422000 | 0.030925000  |
| H | 3.122731000  | -4.038102000 | 0.131507000  |
| H | 5.601824000  | -3.890791000 | 0.176989000  |
| H | 6.742203000  | -1.677401000 | 0.138005000  |
| H | 5.410422000  | 0.426958000  | 0.043035000  |
| S | 0.230207000  | -3.094318000 | 0.061222000  |
| I | 2.168106000  | 0.991422000  | -0.073448000 |
| I | -2.233836000 | 0.696000000  | -0.066201000 |

**Complex 1-cat1-F2:** E= -2038.00076081 (i = 0)

|   |              |              |              |
|---|--------------|--------------|--------------|
| C | -1.440917000 | 4.698714000  | -0.121121000 |
| H | -2.318495000 | 4.059116000  | -0.242419000 |
| C | -1.603737000 | 6.032586000  | -0.084490000 |
| H | -2.601490000 | 6.470000000  | -0.173232000 |
| H | -0.772648000 | 6.730915000  | 0.036173000  |
| C | -0.155411000 | 4.000463000  | -0.012250000 |
| C | 1.149101000  | 4.742049000  | 0.068839000  |
| H | 1.044049000  | 5.823277000  | 0.201136000  |
| H | 1.740104000  | 4.337229000  | 0.903845000  |
| H | 1.707114000  | 4.561177000  | -0.865220000 |
| O | -0.137490000 | 2.753553000  | -0.005860000 |
| C | -2.559027000 | -1.969415000 | -0.009731000 |
| C | -3.387522000 | -0.826911000 | 0.016317000  |
| C | -4.774966000 | -0.882454000 | 0.037930000  |
| C | -5.373712000 | -2.145209000 | 0.035508000  |
| C | -4.567876000 | -3.287993000 | 0.010448000  |
| C | -3.177720000 | -3.229022000 | -0.012878000 |
| C | -1.133244000 | -1.703285000 | -0.025552000 |
| H | -6.459151000 | -2.253767000 | 0.053149000  |
| H | -2.599144000 | -4.154015000 | -0.032073000 |
| C | -0.662475000 | -0.400383000 | -0.016623000 |
| C | 3.502567000  | -0.442082000 | 0.013812000  |
| C | 2.804366000  | -1.667959000 | -0.022689000 |
| C | 3.555438000  | -2.852929000 | -0.038204000 |
| C | 4.943653000  | -2.762104000 | -0.013223000 |
| C | 5.620135000  | -1.539083000 | 0.029864000  |
| C | 4.887765000  | -0.349037000 | 0.044231000  |
| C | 0.746148000  | -0.320169000 | -0.018984000 |
| C | 1.358648000  | -1.562020000 | -0.032933000 |

|   |              |              |              |
|---|--------------|--------------|--------------|
| H | 3.078768000  | -3.833708000 | -0.069409000 |
| H | 6.710774000  | -1.529201000 | 0.051689000  |
| S | 0.181617000  | -2.842741000 | -0.043216000 |
| I | 2.160326000  | 1.226534000  | 0.017297000  |
| I | -2.240626000 | 0.976232000  | 0.017211000  |
| F | 5.656459000  | -3.886660000 | -0.029162000 |
| F | -5.154182000 | -4.483722000 | 0.008900000  |
| H | -5.391543000 | 0.017745000  | 0.057008000  |
| H | 5.403839000  | 0.610966000  | 0.081471000  |

**Complex 1-cat1-F4:** E= -2236.54952859 (i = 0)

|   |              |              |              |
|---|--------------|--------------|--------------|
| C | -1.258998000 | 4.640209000  | 0.451029000  |
| H | -2.089484000 | 4.012997000  | 0.784803000  |
| C | -1.400582000 | 5.977476000  | 0.452029000  |
| H | -2.338577000 | 6.433990000  | 0.778341000  |
| H | -0.609617000 | 6.659146000  | 0.131413000  |
| C | -0.046976000 | 3.924730000  | 0.044809000  |
| C | 1.233438000  | 4.642222000  | -0.267207000 |
| H | 1.106841000  | 5.712771000  | -0.458634000 |
| H | 1.906933000  | 4.532381000  | 0.600225000  |
| H | 1.713884000  | 4.174153000  | -1.138301000 |
| O | -0.065405000 | 2.676057000  | -0.008946000 |
| C | -2.610545000 | -1.938253000 | 0.022621000  |
| C | -3.382819000 | -0.760107000 | -0.042268000 |
| C | -4.771587000 | -0.791604000 | -0.075293000 |
| C | -5.433052000 | -2.015167000 | -0.050003000 |
| C | -4.663970000 | -3.181432000 | 0.011305000  |
| C | -3.270711000 | -3.174564000 | 0.049524000  |
| C | -1.177910000 | -1.709063000 | 0.047102000  |
| H | -6.522337000 | -2.058595000 | -0.077664000 |
| H | -2.727175000 | -4.119067000 | 0.098632000  |
| C | -0.674914000 | -0.418331000 | 0.011302000  |
| C | 3.457365000  | -0.553347000 | -0.014718000 |
| C | 2.757729000  | -1.775246000 | 0.056433000  |
| C | 3.492971000  | -2.967440000 | 0.109768000  |
| C | 4.884379000  | -2.888944000 | 0.087555000  |
| C | 5.581198000  | -1.678746000 | 0.014933000  |
| C | 4.845173000  | -0.499487000 | -0.035553000 |
| C | 0.734806000  | -0.375409000 | 0.014740000  |
| C | 1.313726000  | -1.633532000 | 0.061363000  |
| H | 3.009056000  | -3.942799000 | 0.170123000  |
| H | 6.671298000  | -1.655803000 | -0.001125000 |
| S | 0.104127000  | -2.881198000 | 0.100330000  |
| I | 2.182436000  | 1.142431000  | -0.078704000 |
| I | -2.211234000 | 1.009374000  | -0.063698000 |
| F | 5.585796000  | -4.016142000 | 0.137951000  |
| F | -5.294961000 | -4.350401000 | 0.034257000  |
| F | -5.454681000 | 0.347630000  | -0.131464000 |
| F | 5.453886000  | 0.680254000  | -0.104191000 |

**Complex 1-cat1-F8:** E= -2633.61344329 (i = 0)

|   |              |             |              |
|---|--------------|-------------|--------------|
| C | 1.232026000  | 4.939663000 | -0.304056000 |
| H | 2.012921000  | 4.348317000 | -0.789299000 |
| C | 1.408482000  | 6.263816000 | -0.145656000 |
| H | 2.327322000  | 6.743750000 | -0.492149000 |
| H | 0.666495000  | 6.909748000 | 0.328848000  |
| C | 0.041195000  | 4.197229000 | 0.108873000  |
| C | -1.196662000 | 4.887178000 | 0.599418000  |
| H | -1.021813000 | 5.916952000 | 0.928512000  |
| H | -1.925528000 | 4.921672000 | -0.229328000 |
| H | -1.637945000 | 4.313568000 | 1.426865000  |

|   |              |              |              |
|---|--------------|--------------|--------------|
| O | 0.044222000  | 2.948118000  | 0.012381000  |
| C | 2.622264000  | -1.606482000 | 0.036008000  |
| C | 3.401240000  | -0.431889000 | -0.004370000 |
| C | 4.786151000  | -0.450405000 | -0.029401000 |
| C | 5.437073000  | -1.692072000 | -0.012947000 |
| C | 4.690623000  | -2.877869000 | 0.027299000  |
| C | 3.294532000  | -2.833798000 | 0.051747000  |
| C | 1.190654000  | -1.403995000 | 0.048352000  |
| C | 0.682959000  | -0.114285000 | 0.026312000  |
| C | -3.454044000 | -0.263550000 | -0.026216000 |
| C | -2.735082000 | -1.475483000 | 0.013852000  |
| C | -3.467976000 | -2.667548000 | 0.012984000  |
| C | -4.864326000 | -2.641470000 | -0.028473000 |
| C | -5.550295000 | -1.419422000 | -0.068666000 |
| C | -4.837221000 | -0.212464000 | -0.067567000 |
| C | -0.725576000 | -0.079695000 | 0.022957000  |
| C | -1.295382000 | -1.343278000 | 0.037963000  |
| S | -0.082540000 | -2.589691000 | 0.068803000  |
| I | -2.177177000 | 1.435432000  | -0.008838000 |
| I | 2.208986000  | 1.327269000  | -0.039176000 |
| F | -5.546553000 | -3.771714000 | -0.031194000 |
| F | 5.316299000  | -4.040146000 | 0.040514000  |
| F | 5.492369000  | 0.669626000  | -0.070467000 |
| F | -5.483588000 | 0.943446000  | -0.106872000 |
| F | -2.832650000 | -3.833041000 | 0.047074000  |
| F | -6.869727000 | -1.407356000 | -0.108578000 |
| F | 6.755750000  | -1.747712000 | -0.036855000 |
| F | 2.600953000  | -3.965560000 | 0.086482000  |

**Complex 1-cat1-NMe<sub>2</sub>:** E= -2107.51386766 (i = 0)

|   |              |              |              |
|---|--------------|--------------|--------------|
| C | 1.359945000  | 5.297929000  | -0.082229000 |
| H | 2.237295000  | 4.685867000  | -0.306774000 |
| C | 1.501679000  | 6.627260000  | 0.053613000  |
| H | 2.484439000  | 7.093067000  | -0.056123000 |
| H | 0.666764000  | 7.294105000  | 0.280099000  |
| C | 0.096223000  | 4.560773000  | 0.048628000  |
| C | -1.220407000 | 5.261495000  | 0.240365000  |
| H | -1.138870000 | 6.342260000  | 0.392601000  |
| H | -1.837485000 | 5.084419000  | -0.656055000 |
| H | -1.739902000 | 4.816334000  | 1.102608000  |
| O | 0.109450000  | 3.318433000  | -0.017966000 |
| C | 2.619807000  | -1.394967000 | 0.009973000  |
| C | 3.425852000  | -0.238201000 | -0.011947000 |
| C | 4.813667000  | -0.301455000 | -0.020322000 |
| C | 5.419890000  | -1.554181000 | -0.007046000 |
| C | 4.656673000  | -2.761996000 | 0.014186000  |
| C | 3.239796000  | -2.647116000 | 0.022905000  |
| C | 1.189712000  | -1.145448000 | 0.014593000  |
| H | 6.507454000  | -1.588624000 | -0.013716000 |
| H | 2.610010000  | -3.534393000 | 0.039366000  |
| C | 0.694739000  | 0.147617000  | -0.000839000 |
| C | -3.470673000 | 0.028204000  | -0.022291000 |
| C | -2.754545000 | -1.185948000 | 0.002188000  |
| C | -3.464438000 | -2.389271000 | 0.012281000  |
| C | -4.885840000 | -2.399808000 | -0.001587000 |
| C | -5.556712000 | -1.138757000 | -0.027962000 |
| C | -4.859445000 | 0.065460000  | -0.038040000 |
| C | -0.717339000 | 0.203792000  | -0.002911000 |
| C | -1.310341000 | -1.046778000 | 0.010367000  |
| H | -2.898737000 | -3.318970000 | 0.029796000  |
| H | -6.643739000 | -1.092671000 | -0.040216000 |

|   |              |              |              |
|---|--------------|--------------|--------------|
| S | -0.108566000 | -2.306045000 | 0.029621000  |
| I | -2.165623000 | 1.722219000  | -0.027139000 |
| I | 2.256802000  | 1.546721000  | -0.035784000 |
| H | 5.431778000  | 0.598135000  | -0.037339000 |
| H | -5.410746000 | 1.006443000  | -0.058614000 |
| N | -5.584240000 | -3.572519000 | 0.009604000  |
| C | -7.039732000 | -3.561699000 | -0.016156000 |
| H | -7.461547000 | -3.044770000 | 0.863313000  |
| H | -7.429528000 | -3.068944000 | -0.923800000 |
| H | -7.409316000 | -4.593316000 | -0.008944000 |
| N | 5.265357000  | -3.983910000 | 0.025508000  |
| C | 4.463791000  | -5.197861000 | 0.044844000  |
| H | 3.824075000  | -5.251937000 | 0.943348000  |
| H | 3.812770000  | -5.273116000 | -0.843996000 |
| H | 5.126125000  | -6.070882000 | 0.050985000  |
| C | -4.874730000 | -4.841983000 | 0.043579000  |
| H | -4.241673000 | -4.931998000 | 0.943704000  |
| H | -5.599338000 | -5.663886000 | 0.059366000  |
| H | -4.230536000 | -4.975173000 | -0.843375000 |
| C | 6.717736000  | -4.081507000 | 0.014851000  |
| H | 7.153073000  | -3.620940000 | -0.889094000 |
| H | 7.167698000  | -3.596056000 | 0.898297000  |
| H | 7.009234000  | -5.137823000 | 0.027245000  |

**Complex 1-cat1-NO<sub>2</sub>:** E= -2248.61487601 (i = 0)

|   |              |              |              |
|---|--------------|--------------|--------------|
| C | -1.308435000 | 5.122879000  | 0.470437000  |
| H | -2.133091000 | 4.486492000  | 0.801392000  |
| C | -1.459549000 | 6.458928000  | 0.483546000  |
| H | -2.399497000 | 6.905923000  | 0.817348000  |
| H | -0.674693000 | 7.149021000  | 0.165962000  |
| C | -0.092929000 | 4.418240000  | 0.053722000  |
| C | 1.180306000  | 5.147255000  | -0.263149000 |
| H | 1.046640000  | 6.219726000  | -0.438056000 |
| H | 1.865367000  | 5.027672000  | 0.593717000  |
| H | 1.651230000  | 4.692849000  | -1.146540000 |
| O | -0.102202000 | 3.170578000  | -0.006648000 |
| C | -2.613370000 | -1.463658000 | 0.002254000  |
| C | -3.423795000 | -0.308474000 | -0.052876000 |
| C | -4.811259000 | -0.335499000 | -0.081375000 |
| C | -5.434179000 | -1.586787000 | -0.058609000 |
| C | -4.645731000 | -2.738915000 | -0.006636000 |
| C | -3.255627000 | -2.710066000 | 0.025286000  |
| C | -1.183149000 | -1.224602000 | 0.023215000  |
| H | -5.411237000 | 0.574730000  | -0.120171000 |
| H | -6.519888000 | -1.672162000 | -0.080733000 |
| H | -2.694111000 | -3.643659000 | 0.066537000  |
| C | -0.690260000 | 0.069572000  | -0.006146000 |
| C | 3.474721000  | -0.054797000 | -0.043205000 |
| C | 2.749284000  | -1.264005000 | 0.025035000  |
| C | 3.478401000  | -2.460523000 | 0.073549000  |
| C | 4.866959000  | -2.392137000 | 0.047428000  |
| C | 5.571397000  | -1.188021000 | -0.024422000 |
| C | 4.860640000  | 0.014793000  | -0.070163000 |
| C | 0.719581000  | 0.122947000  | -0.004687000 |
| C | 1.305953000  | -1.130885000 | 0.033706000  |
| H | 2.983200000  | -3.429416000 | 0.133505000  |
| H | 6.660522000  | -1.196069000 | -0.043039000 |
| H | 5.393678000  | 0.963978000  | -0.126355000 |
| S | 0.106938000  | -2.388758000 | 0.066117000  |
| I | 2.163887000  | 1.640645000  | -0.092310000 |
| I | -2.242255000 | 1.475494000  | -0.068444000 |



|   |              |              |             |
|---|--------------|--------------|-------------|
| N | 5.633284000  | -3.663189000 | 0.099533000 |
| O | 6.848466000  | -3.586047000 | 0.079411000 |
| O | 4.996081000  | -4.700314000 | 0.158732000 |
| N | -5.320105000 | -4.062083000 | 0.016888000 |
| O | -4.610960000 | -5.052614000 | 0.049917000 |
| O | -6.537837000 | -4.070965000 | 0.001356000 |

**Complex 1-cat2'**: E= -2232.45389759 (i = 0)

|   |              |              |              |
|---|--------------|--------------|--------------|
| C | -1.913429000 | 5.450375000  | 0.020720000  |
| H | -2.709776000 | 4.699529000  | 0.015754000  |
| C | -2.209772000 | 6.758587000  | -0.008849000 |
| H | -3.248576000 | 7.097520000  | -0.038393000 |
| H | -1.440616000 | 7.535547000  | -0.005013000 |
| C | -0.543577000 | 4.900805000  | 0.062934000  |
| C | 0.644640000  | 5.825251000  | 0.075057000  |
| H | 0.634549000  | 6.473004000  | -0.815283000 |
| H | 0.606301000  | 6.482850000  | 0.957537000  |
| H | 1.576236000  | 5.246392000  | 0.093817000  |
| O | -0.387785000 | 3.676170000  | 0.089019000  |
| H | -1.990338000 | -1.416966000 | 3.063151000  |
| C | -1.037041000 | -1.381813000 | 2.534093000  |
| C | 1.348283000  | -1.206127000 | 1.125572000  |
| C | -1.037145000 | -1.484863000 | 1.139657000  |
| C | 0.159226000  | -1.211426000 | 3.226380000  |
| C | 1.353836000  | -1.097720000 | 2.516245000  |
| C | 0.162471000  | -1.451461000 | 0.406141000  |
| H | 0.157298000  | -1.132838000 | 4.314397000  |
| H | 2.297980000  | -0.909966000 | 3.029325000  |
| N | 2.591432000  | -1.008749000 | 0.434391000  |
| N | -2.313746000 | -1.551014000 | 0.489097000  |
| C | -2.977553000 | -0.486017000 | -0.031218000 |
| N | -4.135719000 | -0.905899000 | -0.560926000 |
| C | -3.073583000 | -2.704358000 | 0.281561000  |
| C | -4.234877000 | -2.290023000 | -0.388831000 |
| C | 3.044911000  | 0.187378000  | -0.029730000 |
| N | 4.268935000  | 0.021121000  | -0.550063000 |
| C | 3.576757000  | -1.978941000 | 0.221259000  |
| C | 4.642221000  | -1.319524000 | -0.409738000 |
| C | -5.163484000 | -0.103827000 | -1.219514000 |
| H | -6.109025000 | -0.209017000 | -0.670447000 |
| H | -4.860926000 | 0.948359000  | -1.230955000 |
| H | -5.291913000 | -0.460454000 | -2.250362000 |
| C | 5.126105000  | 1.033768000  | -1.161374000 |
| H | 5.440545000  | 0.681351000  | -2.152708000 |
| H | 4.571286000  | 1.971570000  | -1.268136000 |
| H | 6.009217000  | 1.195869000  | -0.528186000 |
| C | -5.228128000 | -3.198778000 | -0.765630000 |
| C | -2.838285000 | -4.042177000 | 0.603841000  |
| C | 3.617948000  | -3.342522000 | 0.517487000  |
| C | 5.809392000  | -1.995806000 | -0.777356000 |
| H | -6.131165000 | -2.880511000 | -1.286899000 |
| H | -1.929348000 | -4.353925000 | 1.119400000  |
| H | 6.638858000  | -1.484570000 | -1.266224000 |
| H | 2.782381000  | -3.846540000 | 1.003641000  |
| C | -4.999772000 | -4.535589000 | -0.442517000 |
| C | -3.827640000 | -4.949519000 | 0.228240000  |
| C | 4.781201000  | -4.017864000 | 0.152509000  |
| C | 5.856055000  | -3.357381000 | -0.482764000 |
| H | -5.746210000 | -5.283389000 | -0.717149000 |
| H | -3.692807000 | -6.008398000 | 0.457437000  |
| H | 6.747106000  | -3.928761000 | -0.750020000 |

|   |              |              |              |
|---|--------------|--------------|--------------|
| H | 4.863612000  | -5.086096000 | 0.362261000  |
| C | 0.250571000  | -1.696597000 | -1.097234000 |
| I | -2.184881000 | 1.451754000  | 0.003227000  |
| I | 1.907187000  | 1.938130000  | 0.073639000  |
| F | 1.104654000  | -2.703817000 | -1.342889000 |
| F | 0.709545000  | -0.616612000 | -1.750877000 |
| F | -0.921633000 | -2.025677000 | -1.649805000 |

**TS-1:** E= -464.838812507 (i = -457 cm<sup>-1</sup>)

|   |              |              |              |
|---|--------------|--------------|--------------|
| C | -0.530452000 | 1.070230000  | 0.938940000  |
| C | -1.663803000 | 1.481853000  | 0.031638000  |
| C | -2.382527000 | 0.272366000  | -0.630814000 |
| C | -1.732439000 | -1.058945000 | -0.290559000 |
| C | -1.206780000 | -1.233332000 | 0.995416000  |
| C | -0.565977000 | -0.140365000 | 1.609474000  |
| H | -3.423807000 | 0.223336000  | -0.271210000 |
| H | -2.383669000 | 2.036750000  | 0.659560000  |
| H | -1.312676000 | 2.206689000  | -0.717445000 |
| H | 0.137119000  | 1.862816000  | 1.287791000  |
| H | -2.159242000 | -1.931731000 | -0.795159000 |
| H | -1.074054000 | -2.239761000 | 1.403250000  |
| H | 0.073424000  | -0.303743000 | 2.481379000  |
| H | -2.446367000 | 0.398596000  | -1.722459000 |
| C | 0.754712000  | 0.264359000  | -1.013193000 |
| H | 0.567840000  | 1.226110000  | -1.495535000 |
| C | 0.031974000  | -0.865347000 | -1.419830000 |
| H | -0.546378000 | -0.795053000 | -2.344144000 |
| H | 0.438711000  | -1.858952000 | -1.224346000 |
| C | 2.004082000  | 0.231069000  | -0.240492000 |
| C | 2.436068000  | -1.092180000 | 0.370884000  |
| H | 1.604845000  | -1.603548000 | 0.878793000  |
| H | 2.795104000  | -1.767597000 | -0.423916000 |
| H | 3.254930000  | -0.911953000 | 1.079870000  |
| O | 2.700634000  | 1.234975000  | -0.113152000 |

**TS-BF<sub>3</sub>:** E= -789.604045439 (i = -353 cm<sup>-1</sup>)

|   |              |              |              |
|---|--------------|--------------|--------------|
| C | -1.067085000 | -0.823379000 | -1.342786000 |
| C | -1.354660000 | -1.887803000 | -0.330476000 |
| C | -2.476649000 | -1.525602000 | 0.676878000  |
| C | -2.909617000 | -0.070146000 | 0.616850000  |
| C | -2.876156000 | 0.591612000  | -0.614659000 |
| C | -1.907723000 | 0.232911000  | -1.584640000 |
| H | -3.377321000 | -2.123856000 | 0.460749000  |
| H | -1.640112000 | -2.788982000 | -0.904388000 |
| H | -0.410607000 | -2.160088000 | 0.160545000  |
| H | -0.193146000 | -0.983936000 | -1.978757000 |
| H | -3.702487000 | 0.213994000  | 1.315441000  |
| H | -3.462952000 | 1.504147000  | -0.753842000 |
| H | -1.736550000 | 0.886112000  | -2.443343000 |
| H | -2.179920000 | -1.789485000 | 1.703081000  |
| C | -0.139416000 | 0.532363000  | 1.041896000  |
| H | 0.309976000  | -0.384814000 | 1.417194000  |
| C | -1.390070000 | 0.929629000  | 1.555339000  |
| H | -1.684760000 | 0.487757000  | 2.510715000  |
| H | -1.726290000 | 1.960248000  | 1.431379000  |
| C | 0.601273000  | 1.259722000  | 0.090035000  |
| C | 0.134290000  | 2.574341000  | -0.465384000 |
| H | -0.957786000 | 2.649612000  | -0.531790000 |
| H | 0.488616000  | 3.385210000  | 0.194057000  |
| H | 0.575640000  | 2.728168000  | -1.458788000 |
| O | 1.776181000  | 0.908292000  | -0.317492000 |

|   |             |              |              |
|---|-------------|--------------|--------------|
| B | 2.510568000 | -0.377678000 | 0.038187000  |
| F | 2.661641000 | -0.454505000 | 1.417894000  |
| F | 1.749223000 | -1.451437000 | -0.435633000 |
| F | 3.728059000 | -0.298937000 | -0.607992000 |

**TS-cat1:** E= -2072.95584124 (i = -384 cm<sup>-1</sup>)

|   |              |              |              |
|---|--------------|--------------|--------------|
| C | -4.048166000 | -0.785448000 | 1.653860000  |
| C | -4.885235000 | 0.259720000  | 0.978902000  |
| C | -6.010218000 | -0.307851000 | 0.074703000  |
| C | -5.927866000 | -1.809620000 | -0.143508000 |
| C | -5.418013000 | -2.611821000 | 0.883842000  |
| C | -4.427653000 | -2.097726000 | 1.757555000  |
| H | -6.988832000 | -0.118598000 | 0.544314000  |
| H | -5.324940000 | 0.871073000  | 1.788318000  |
| H | -4.236890000 | 0.962787000  | 0.434664000  |
| H | -3.170223000 | -0.437582000 | 2.207006000  |
| H | -6.731583000 | -2.235293000 | -0.751672000 |
| H | -5.636993000 | -3.683332000 | 0.892322000  |
| H | -3.877875000 | -2.779393000 | 2.409985000  |
| H | -6.035664000 | 0.213976000  | -0.893298000 |
| C | -3.295904000 | -1.307955000 | -1.133142000 |
| H | -3.279939000 | -0.252677000 | -1.410652000 |
| C | -4.447277000 | -2.049427000 | -1.482154000 |
| H | -5.068926000 | -1.616651000 | -2.270766000 |
| H | -4.388559000 | -3.137696000 | -1.536817000 |
| C | -2.127599000 | -1.822404000 | -0.528134000 |
| C | -2.014149000 | -3.274454000 | -0.134687000 |
| H | -2.983586000 | -3.773602000 | -0.026750000 |
| H | -1.443587000 | -3.818722000 | -0.907058000 |
| H | -1.474005000 | -3.356179000 | 0.819180000  |
| O | -1.086519000 | -1.091420000 | -0.346966000 |
| C | 1.093247000  | 3.555790000  | 0.071319000  |
| C | -0.307655000 | 3.536169000  | -0.101425000 |
| C | -1.088591000 | 4.682811000  | -0.135083000 |
| C | -0.436497000 | 5.914202000  | 0.012681000  |
| C | 0.953078000  | 5.971051000  | 0.186845000  |
| C | 1.718911000  | 4.806110000  | 0.216799000  |
| C | 1.733391000  | 2.254442000  | 0.082832000  |
| H | -2.170256000 | 4.641435000  | -0.271911000 |
| H | -1.024273000 | 6.834133000  | -0.009096000 |
| H | 1.444454000  | 6.939159000  | 0.301064000  |
| H | 2.801372000  | 4.858463000  | 0.354071000  |
| C | 0.980399000  | 1.102660000  | -0.058363000 |
| C | 3.472464000  | -2.223612000 | 0.037070000  |
| C | 4.045544000  | -0.940780000 | 0.175446000  |
| C | 5.440452000  | -0.860104000 | 0.329745000  |
| C | 6.205129000  | -2.026140000 | 0.336141000  |
| C | 5.602240000  | -3.282991000 | 0.190047000  |
| C | 4.213875000  | -3.396759000 | 0.038256000  |
| C | 1.753934000  | -0.075067000 | -0.026590000 |
| C | 3.106968000  | 0.164208000  | 0.133840000  |
| H | 5.918301000  | 0.115607000  | 0.443250000  |
| H | 7.288044000  | -1.956657000 | 0.455321000  |
| H | 6.213584000  | -4.187676000 | 0.193744000  |
| H | 3.746562000  | -4.376553000 | -0.074892000 |
| S | 3.425163000  | 1.873436000  | 0.252750000  |
| I | 1.334373000  | -2.115717000 | -0.159000000 |
| I | -1.051269000 | 1.527044000  | -0.302498000 |

**TS-cat1-F2:** E= -2271.51275295 (i = -372 cm<sup>-1</sup>)

|   |              |              |              |
|---|--------------|--------------|--------------|
| C | -4.060284000 | -1.207641000 | 1.792546000  |
| C | -4.979123000 | -0.097759000 | 1.377567000  |
| C | -6.197992000 | -0.559437000 | 0.536128000  |
| C | -6.129986000 | -2.013572000 | 0.101221000  |
| C | -5.503064000 | -2.938960000 | 0.943320000  |
| C | -4.421562000 | -2.529362000 | 1.761859000  |
| H | -7.117194000 | -0.459946000 | 1.135662000  |
| H | -5.327046000 | 0.376668000  | 2.313519000  |
| H | -4.405072000 | 0.693658000  | 0.872665000  |
| H | -3.119392000 | -0.919074000 | 2.271562000  |
| H | -6.989989000 | -2.368556000 | -0.474431000 |
| H | -5.714858000 | -4.005643000 | 0.827757000  |
| H | -3.796267000 | -3.282743000 | 2.245536000  |
| H | -6.339848000 | 0.091178000  | -0.339334000 |
| C | -3.618058000 | -1.314187000 | -1.078705000 |
| H | -3.643739000 | -0.229105000 | -1.190498000 |
| C | -4.793763000 | -2.020624000 | -1.415773000 |
| H | -5.501169000 | -1.490243000 | -2.059192000 |
| H | -4.735562000 | -3.088211000 | -1.633291000 |
| C | -2.392250000 | -1.887911000 | -0.670027000 |
| C | -2.238682000 | -3.379938000 | -0.511264000 |
| H | -3.193686000 | -3.910578000 | -0.436102000 |
| H | -1.697027000 | -3.783650000 | -1.383678000 |
| H | -1.655435000 | -3.599063000 | 0.394137000  |
| O | -1.340272000 | -1.174224000 | -0.481143000 |
| C | 0.869958000  | 3.451838000  | 0.047834000  |
| C | -0.525397000 | 3.437228000  | -0.168783000 |
| C | -1.294794000 | 4.593131000  | -0.219853000 |
| C | -0.649338000 | 5.820835000  | -0.047993000 |
| C | 0.732021000  | 5.846147000  | 0.167468000  |
| C | 1.505777000  | 4.691044000  | 0.219254000  |
| C | 1.503077000  | 2.146980000  | 0.068356000  |
| H | -1.204230000 | 6.759594000  | -0.079835000 |
| H | 2.580888000  | 4.766602000  | 0.390764000  |
| C | 0.745994000  | 1.002195000  | -0.108574000 |
| C | 3.211355000  | -2.336088000 | -0.007532000 |
| C | 3.790842000  | -1.060932000 | 0.174672000  |
| C | 5.178136000  | -0.983016000 | 0.370733000  |
| C | 5.916237000  | -2.162192000 | 0.371637000  |
| C | 5.332489000  | -3.418863000 | 0.184475000  |
| C | 3.951243000  | -3.512175000 | -0.008973000 |
| C | 1.511964000  | -0.179155000 | -0.073808000 |
| C | 2.861339000  | 0.051524000  | 0.128151000  |
| H | 5.685388000  | -0.028491000 | 0.519964000  |
| H | 5.962589000  | -4.309478000 | 0.191773000  |
| S | 3.186119000  | 1.755531000  | 0.281124000  |
| I | 1.084790000  | -2.212875000 | -0.265216000 |
| I | -1.275262000 | 1.438562000  | -0.400057000 |
| F | 7.234179000  | -2.089315000 | 0.557216000  |
| F | 1.332441000  | 7.025059000  | 0.330235000  |
| H | -2.371923000 | 4.562956000  | -0.390185000 |
| H | 3.486483000  | -4.488357000 | -0.156834000 |

**TS-cat1-F4:** E= -2470.06394323 (i = -362 cm<sup>-1</sup>)

|   |              |              |              |
|---|--------------|--------------|--------------|
| C | -3.844558000 | -2.002541000 | 1.707850000  |
| C | -4.956830000 | -1.256816000 | 1.033788000  |
| C | -5.887961000 | -2.139831000 | 0.163774000  |
| C | -5.371846000 | -3.550825000 | -0.056961000 |
| C | -4.614191000 | -4.157543000 | 0.949133000  |
| C | -3.806282000 | -3.367307000 | 1.807185000  |

|   |              |              |              |
|---|--------------|--------------|--------------|
| H | -6.864935000 | -2.245654000 | 0.662585000  |
| H | -5.539151000 | -0.775682000 | 1.840806000  |
| H | -4.546073000 | -0.410312000 | 0.462555000  |
| H | -3.105287000 | -1.405970000 | 2.252006000  |
| H | -6.023160000 | -4.200251000 | -0.649317000 |
| H | -4.502112000 | -5.245256000 | 0.959629000  |
| H | -3.066330000 | -3.851651000 | 2.447831000  |
| H | -6.096395000 | -1.655989000 | -0.802027000 |
| C | -3.001042000 | -2.316947000 | -1.112598000 |
| H | -3.289524000 | -1.297194000 | -1.374339000 |
| C | -3.907680000 | -3.348926000 | -1.444066000 |
| H | -4.653974000 | -3.104317000 | -2.204392000 |
| H | -3.549961000 | -4.377542000 | -1.510561000 |
| C | -1.726662000 | -2.500040000 | -0.540176000 |
| C | -1.212601000 | -3.868562000 | -0.175423000 |
| H | -2.009119000 | -4.610202000 | -0.050407000 |
| H | -0.543379000 | -4.233376000 | -0.973846000 |
| H | -0.642626000 | -3.813784000 | 0.762812000  |
| O | -0.913585000 | -1.512556000 | -0.363359000 |
| C | -0.144478000 | 3.531009000  | 0.051533000  |
| C | -1.469892000 | 3.074044000  | -0.110935000 |
| C | -2.541557000 | 3.956730000  | -0.145770000 |
| C | -2.321723000 | 5.324738000  | -0.018655000 |
| C | -1.005554000 | 5.768584000  | 0.141484000  |
| C | 0.089368000  | 4.907184000  | 0.180417000  |
| C | 0.846147000  | 2.469208000  | 0.064601000  |
| H | -3.154234000 | 6.028436000  | -0.044342000 |
| H | 1.092990000  | 5.314802000  | 0.307803000  |
| C | 0.447373000  | 1.150561000  | -0.069409000 |
| C | 3.731567000  | -1.334336000 | 0.007783000  |
| C | 3.960268000  | 0.052414000  | 0.136064000  |
| C | 5.276977000  | 0.514087000  | 0.270241000  |
| C | 6.308780000  | -0.422362000 | 0.268478000  |
| C | 6.091092000  | -1.797373000 | 0.138847000  |
| C | 4.780186000  | -2.245387000 | 0.007771000  |
| C | 1.520556000  | 0.241479000  | -0.045483000 |
| C | 2.751628000  | 0.855653000  | 0.103398000  |
| H | 5.507969000  | 1.575080000  | 0.371541000  |
| H | 6.923119000  | -2.502178000 | 0.139325000  |
| S | 2.576484000  | 2.583985000  | 0.221059000  |
| I | 1.668607000  | -1.839026000 | -0.175249000 |
| I | -1.619707000 | 0.954970000  | -0.300617000 |
| F | 7.561016000  | 0.007552000  | 0.394464000  |
| F | -0.793088000 | 7.076094000  | 0.261920000  |
| F | -3.777458000 | 3.483969000  | -0.301905000 |
| F | 4.521629000  | -3.545249000 | -0.119372000 |

**TS-cat1-F8:** E= -2867.13021689 (i = -331 cm<sup>-1</sup>)

|   |              |              |              |
|---|--------------|--------------|--------------|
| C | -3.520040000 | -2.868292000 | 1.793955000  |
| C | -4.766885000 | -2.330623000 | 1.158754000  |
| C | -5.564569000 | -3.365596000 | 0.324171000  |
| C | -4.836679000 | -4.678389000 | 0.103738000  |
| C | -3.938307000 | -5.130973000 | 1.071488000  |
| C | -3.240830000 | -4.203567000 | 1.890859000  |
| H | -6.499457000 | -3.619370000 | 0.849707000  |
| H | -5.392977000 | -1.950748000 | 1.986774000  |
| H | -4.531231000 | -1.429153000 | 0.572366000  |
| H | -2.875030000 | -2.149073000 | 2.309155000  |
| H | -5.392027000 | -5.435800000 | -0.457027000 |
| H | -3.640882000 | -6.183258000 | 1.081127000  |
| H | -2.402746000 | -4.548264000 | 2.499939000  |

|   |              |              |              |
|---|--------------|--------------|--------------|
| H | -5.872404000 | -2.937468000 | -0.641027000 |
| C | -2.740735000 | -3.088877000 | -1.085724000 |
| H | -3.210093000 | -2.143753000 | -1.366114000 |
| C | -3.464954000 | -4.270718000 | -1.357435000 |
| H | -4.274565000 | -4.181905000 | -2.086308000 |
| H | -2.940358000 | -5.225593000 | -1.409706000 |
| C | -1.442662000 | -3.031585000 | -0.546756000 |
| C | -0.681979000 | -4.275006000 | -0.168198000 |
| H | -1.324412000 | -5.152265000 | -0.036187000 |
| H | 0.044833000  | -4.515539000 | -0.963288000 |
| H | -0.133836000 | -4.106971000 | 0.769653000  |
| O | -0.810434000 | -1.908040000 | -0.414888000 |
| C | -0.964863000 | 3.156632000  | 0.026494000  |
| C | -2.190820000 | 2.484926000  | -0.162149000 |
| C | -3.402197000 | 3.152640000  | -0.201909000 |
| C | -3.410581000 | 4.545958000  | -0.050096000 |
| C | -2.206693000 | 5.238516000  | 0.140027000  |
| C | -0.993042000 | 4.547582000  | 0.177932000  |
| C | 0.205176000  | 2.305276000  | 0.040216000  |
| C | 0.046478000  | 0.938572000  | -0.114417000 |
| C | 3.721133000  | -0.930668000 | -0.043479000 |
| C | 3.685104000  | 0.472619000  | 0.101901000  |
| C | 4.900798000  | 1.149266000  | 0.252488000  |
| C | 6.106516000  | 0.444020000  | 0.259011000  |
| C | 6.112616000  | -0.950357000 | 0.115710000  |
| C | 4.905939000  | -1.646786000 | -0.037650000 |
| C | 1.263251000  | 0.236677000  | -0.092772000 |
| C | 2.363342000  | 1.060543000  | 0.073019000  |
| S | 1.885697000  | 2.729662000  | 0.215060000  |
| I | 1.773063000  | -1.782227000 | -0.256335000 |
| I | -1.948865000 | 0.370982000  | -0.375665000 |
| F | 7.251273000  | 1.088557000  | 0.400929000  |
| F | -2.227105000 | 6.552237000  | 0.283211000  |
| F | -4.542549000 | 2.497240000  | -0.380782000 |
| F | 4.915619000  | -2.966506000 | -0.173201000 |
| F | 4.911190000  | 2.471420000  | 0.388121000  |
| F | 7.260148000  | -1.605099000 | 0.123722000  |
| F | -4.552386000 | 5.210329000  | -0.083455000 |
| F | 0.140244000  | 5.217834000  | 0.358125000  |

**TS-cat1-NMe<sub>2</sub>**: E= -2341.02335295 (i = -393 cm<sup>-1</sup>)

|   |              |              |              |
|---|--------------|--------------|--------------|
| C | -4.050438000 | -2.043422000 | 1.911872000  |
| C | -5.033716000 | -0.911182000 | 1.884878000  |
| C | -6.380650000 | -1.257630000 | 1.194337000  |
| C | -6.399724000 | -2.630149000 | 0.540671000  |
| C | -5.642008000 | -3.660587000 | 1.112334000  |
| C | -4.423219000 | -3.355934000 | 1.761552000  |
| H | -7.188528000 | -1.258665000 | 1.943301000  |
| H | -5.213271000 | -0.639852000 | 2.941529000  |
| H | -4.560898000 | -0.018653000 | 1.448986000  |
| H | -3.029576000 | -1.806823000 | 2.226289000  |
| H | -7.350341000 | -2.910529000 | 0.077067000  |
| H | -5.879565000 | -4.701712000 | 0.876912000  |
| H | -3.720087000 | -4.158937000 | 1.992907000  |
| H | -6.655070000 | -0.486804000 | 0.458405000  |
| C | -4.142215000 | -1.669416000 | -0.893669000 |
| H | -4.218214000 | -0.585512000 | -0.799466000 |
| C | -5.338418000 | -2.370543000 | -1.155006000 |
| H | -6.151404000 | -1.783567000 | -1.590921000 |
| H | -5.292234000 | -3.390137000 | -1.540754000 |
| C | -2.841608000 | -2.224135000 | -0.784689000 |

|   |              |              |              |
|---|--------------|--------------|--------------|
| C | -2.604988000 | -3.710062000 | -0.905310000 |
| H | -3.524175000 | -4.305069000 | -0.899910000 |
| H | -2.067903000 | -3.909708000 | -1.847493000 |
| H | -1.974319000 | -4.053074000 | -0.072195000 |
| O | -1.808511000 | -1.483379000 | -0.641817000 |
| C | 0.274097000  | 3.240303000  | -0.053225000 |
| C | -1.115428000 | 3.182425000  | -0.290947000 |
| C | -1.894973000 | 4.332291000  | -0.339499000 |
| C | -1.282015000 | 5.567073000  | -0.146794000 |
| C | 0.120045000  | 5.682511000  | 0.099514000  |
| C | 0.882255000  | 4.483770000  | 0.140044000  |
| C | 0.941019000  | 1.950588000  | -0.037128000 |
| H | -2.969831000 | 4.291617000  | -0.524914000 |
| H | -1.908955000 | 6.455427000  | -0.189381000 |
| H | 1.954756000  | 4.511077000  | 0.323797000  |
| C | 0.223255000  | 0.784112000  | -0.231664000 |
| C | 2.791277000  | -2.477738000 | -0.130950000 |
| C | 3.335033000  | -1.189879000 | 0.060216000  |
| C | 4.710702000  | -1.055319000 | 0.267080000  |
| C | 5.560270000  | -2.194474000 | 0.285623000  |
| C | 4.957053000  | -3.474075000 | 0.088436000  |
| C | 3.587794000  | -3.616945000 | -0.117529000 |
| C | 1.026028000  | -0.375435000 | -0.202961000 |
| C | 2.366229000  | -0.108956000 | 0.013216000  |
| H | 5.115820000  | -0.055721000 | 0.413790000  |
| H | 5.564918000  | -4.376558000 | 0.093845000  |
| H | 3.167596000  | -4.613996000 | -0.264151000 |
| S | 2.634482000  | 1.604422000  | 0.188090000  |
| I | 0.672502000  | -2.422844000 | -0.424194000 |
| I | -1.809889000 | 1.170729000  | -0.534054000 |
| N | 0.707352000  | 6.901610000  | 0.289826000  |
| C | -0.091639000 | 8.116853000  | 0.244066000  |
| H | -0.876465000 | 8.122391000  | 1.020668000  |
| H | 0.556910000  | 8.983372000  | 0.416324000  |
| H | -0.579952000 | 8.249891000  | -0.737114000 |
| N | 6.906441000  | -2.069752000 | 0.484339000  |
| C | 7.758683000  | -3.249029000 | 0.500206000  |
| H | 7.468533000  | -3.953847000 | 1.298788000  |
| H | 7.728796000  | -3.790509000 | -0.461632000 |
| H | 8.795372000  | -2.944041000 | 0.682975000  |
| C | 7.495889000  | -0.753651000 | 0.671272000  |
| H | 7.093362000  | -0.247729000 | 1.566537000  |
| H | 8.579473000  | -0.854810000 | 0.800666000  |
| H | 7.319038000  | -0.098373000 | -0.199787000 |
| C | 2.136076000  | 6.988918000  | 0.545866000  |
| H | 2.420803000  | 6.451777000  | 1.467964000  |
| H | 2.727678000  | 6.572561000  | -0.288390000 |
| H | 2.421078000  | 8.040152000  | 0.667531000  |

**TS-cat1-NO<sub>2</sub>:** E= -2482.12833703 (i = -371 cm<sup>-1</sup>)

|   |              |              |              |
|---|--------------|--------------|--------------|
| C | -4.440849000 | -1.821560000 | 1.784201000  |
| C | -5.401074000 | -0.780668000 | 1.292079000  |
| C | -6.510943000 | -1.322234000 | 0.353963000  |
| C | -6.315493000 | -2.769035000 | -0.066066000 |
| C | -5.673422000 | -3.649118000 | 0.811181000  |
| C | -4.687121000 | -3.166349000 | 1.708301000  |
| H | -7.482948000 | -1.280187000 | 0.871255000  |
| H | -5.856228000 | -0.334383000 | 2.195436000  |
| H | -4.845274000 | 0.051900000  | 0.833754000  |
| H | -3.570677000 | -1.467491000 | 2.345925000  |
| H | -7.110404000 | -3.184380000 | -0.692492000 |

|   |              |              |              |
|---|--------------|--------------|--------------|
| H | -5.795069000 | -4.727707000 | 0.678125000  |
| H | -4.042179000 | -3.875025000 | 2.232182000  |
| H | -6.618607000 | -0.683148000 | -0.534919000 |
| C | -3.797763000 | -1.885450000 | -1.096417000 |
| H | -3.915850000 | -0.807909000 | -1.219194000 |
| C | -4.886893000 | -2.693684000 | -1.494076000 |
| H | -5.594696000 | -2.232213000 | -2.187983000 |
| H | -4.725861000 | -3.754562000 | -1.691229000 |
| C | -2.557989000 | -2.348944000 | -0.611555000 |
| C | -2.282810000 | -3.819477000 | -0.426187000 |
| H | -3.190053000 | -4.432392000 | -0.398955000 |
| H | -1.660657000 | -4.179972000 | -1.263055000 |
| H | -1.735006000 | -3.979343000 | 0.513474000  |
| O | -1.578455000 | -1.544933000 | -0.367299000 |
| C | 0.200420000  | 3.251052000  | -0.023558000 |
| C | -1.199908000 | 3.099604000  | -0.142107000 |
| C | -2.084592000 | 4.170323000  | -0.173631000 |
| C | -1.554265000 | 5.460419000  | -0.080931000 |
| C | -0.171079000 | 5.619850000  | 0.037679000  |
| C | 0.718193000  | 4.550549000  | 0.067421000  |
| C | 0.958138000  | 2.013283000  | -0.009450000 |
| H | -3.162897000 | 4.027675000  | -0.265819000 |
| H | -2.201044000 | 6.336708000  | -0.099659000 |
| H | 1.788088000  | 4.736833000  | 0.159825000  |
| C | 0.299499000  | 0.800942000  | -0.111327000 |
| C | 3.046846000  | -2.306405000 | -0.030646000 |
| C | 3.522589000  | -0.978402000 | 0.061383000  |
| C | 4.906850000  | -0.780281000 | 0.159622000  |
| C | 5.736415000  | -1.896950000 | 0.160341000  |
| C | 5.255865000  | -3.205723000 | 0.067079000  |
| C | 3.877872000  | -3.419318000 | -0.030893000 |
| C | 1.168594000  | -0.305322000 | -0.085463000 |
| C | 2.500107000  | 0.050689000  | 0.032375000  |
| H | 5.338808000  | 0.217597000  | 0.233196000  |
| H | 5.954414000  | -4.041581000 | 0.070839000  |
| H | 3.486256000  | -4.435182000 | -0.103758000 |
| S | 2.678950000  | 1.780323000  | 0.120974000  |
| I | 0.905624000  | -2.372985000 | -0.172960000 |
| I | -1.767508000 | 1.032062000  | -0.281517000 |
| N | 7.201268000  | -1.682485000 | 0.263628000  |
| O | 7.913689000  | -2.670481000 | 0.285083000  |
| O | 7.598087000  | -0.531180000 | 0.320238000  |
| N | 0.381102000  | 6.993506000  | 0.138525000  |
| O | 1.586925000  | 7.105566000  | 0.278908000  |
| O | -0.405642000 | 7.921603000  | 0.075545000  |

**TS-cat2'**: E= -2465.95775923 (i = -435 cm<sup>-1</sup>)

|   |              |              |             |
|---|--------------|--------------|-------------|
| C | -2.929058000 | -1.361594000 | 1.684437000 |
| C | -3.794691000 | -0.257026000 | 2.221044000 |
| C | -5.264570000 | -0.686277000 | 2.475800000 |
| C | -5.578796000 | -2.091723000 | 1.982368000 |
| C | -4.574348000 | -3.068558000 | 2.085097000 |
| C | -3.230356000 | -2.690509000 | 1.881658000 |
| H | -5.466850000 | -0.679667000 | 3.558817000 |
| H | -3.329529000 | 0.059863000  | 3.172708000 |
| H | -3.727475000 | 0.625727000  | 1.568408000 |
| H | -1.934171000 | -1.077889000 | 1.328918000 |
| H | -6.609330000 | -2.419050000 | 2.152513000 |
| H | -4.843270000 | -4.128460000 | 2.099012000 |
| H | -2.470103000 | -3.455928000 | 1.706164000 |
| H | -5.966785000 | 0.035522000  | 2.032526000 |



|   |              |              |              |
|---|--------------|--------------|--------------|
| C | -4.518168000 | -1.237871000 | -0.511081000 |
| H | -4.432524000 | -0.150856000 | -0.478930000 |
| C | -5.687124000 | -1.841583000 | -0.005340000 |
| H | -6.565250000 | -1.197259000 | 0.092091000  |
| H | -5.933100000 | -2.858550000 | -0.316612000 |
| C | -3.467251000 | -1.931068000 | -1.196912000 |
| C | -3.571061000 | -3.426509000 | -1.391768000 |
| H | -3.825934000 | -3.943475000 | -0.454729000 |
| H | -4.374813000 | -3.649611000 | -2.112583000 |
| H | -2.629033000 | -3.828240000 | -1.786058000 |
| O | -2.471799000 | -1.327467000 | -1.681552000 |
| H | 1.702583000  | 3.144999000  | -2.811502000 |
| C | 1.990294000  | 2.242116000  | -2.270722000 |
| C | 2.603434000  | -0.081783000 | -0.879539000 |
| C | 1.516799000  | 2.059739000  | -0.967818000 |
| C | 2.791494000  | 1.273176000  | -2.869580000 |
| C | 3.077918000  | 0.096125000  | -2.178928000 |
| C | 1.857777000  | 0.916161000  | -0.222024000 |
| H | 3.161703000  | 1.417204000  | -3.885577000 |
| H | 3.656671000  | -0.702637000 | -2.644667000 |
| N | 2.860948000  | -1.344532000 | -0.243607000 |
| N | 0.622798000  | 3.055684000  | -0.455928000 |
| C | -0.730623000 | 2.943020000  | -0.421833000 |
| N | -1.246716000 | 4.056302000  | 0.120328000  |
| C | 0.992231000  | 4.291167000  | 0.080806000  |
| C | -0.203701000 | 4.930457000  | 0.443718000  |
| C | 2.040634000  | -2.429515000 | -0.299043000 |
| N | 2.635789000  | -3.461403000 | 0.315888000  |
| C | 4.040043000  | -1.703339000 | 0.419122000  |
| C | 3.888657000  | -3.050125000 | 0.782230000  |
| C | -2.657419000 | 4.362220000  | 0.342342000  |
| H | -2.981860000 | 5.144452000  | -0.358700000 |
| H | -3.257493000 | 3.458197000  | 0.192112000  |
| H | -2.784973000 | 4.714245000  | 1.374795000  |
| C | 2.114084000  | -4.812673000 | 0.502567000  |
| H | 1.953117000  | -4.995925000 | 1.573899000  |
| H | 1.167687000  | -4.921088000 | -0.037357000 |
| H | 2.843439000  | -5.533386000 | 0.109459000  |
| C | -0.206466000 | 6.204724000  | 1.018853000  |
| C | 2.241722000  | 4.880641000  | 0.281789000  |
| C | 5.192221000  | -0.977235000 | 0.724517000  |
| C | 4.885211000  | -3.738487000 | 1.480675000  |
| H | -1.132366000 | 6.708236000  | 1.297568000  |
| H | 3.163816000  | 4.369390000  | 0.002881000  |
| H | 4.770135000  | -4.783870000 | 1.767769000  |
| H | 5.301117000  | 0.068282000  | 0.436363000  |
| C | 1.038764000  | 6.799922000  | 1.217491000  |
| C | 2.239910000  | 6.149992000  | 0.858450000  |
| C | 6.188115000  | -1.662710000 | 1.418062000  |
| C | 6.036810000  | -3.016532000 | 1.790417000  |
| H | 1.086301000  | 7.795053000  | 1.663942000  |
| H | 3.191289000  | 6.655124000  | 1.036472000  |
| H | 6.843456000  | -3.511037000 | 2.335078000  |
| H | 7.108980000  | -1.138840000 | 1.681823000  |
| C | 1.501447000  | 0.721119000  | 1.247422000  |
| I | -1.731328000 | 1.201817000  | -1.071169000 |
| I | 0.131607000  | -2.352218000 | -1.154556000 |
| F | 2.611371000  | 0.442064000  | 1.949709000  |
| F | 0.650995000  | -0.307773000 | 1.425643000  |
| F | 0.939953000  | 1.798522000  | 1.804297000  |

**Adduct-1:** E= -464.902924001 (i = 0)

|   |              |              |              |
|---|--------------|--------------|--------------|
| C | 0.272004000  | -0.875921000 | 0.722358000  |
| C | 1.628968000  | -1.451031000 | 0.233565000  |
| C | 2.392394000  | -0.360064000 | -0.564344000 |
| C | 1.559191000  | 0.950077000  | -0.565529000 |
| C | 1.239858000  | 1.311781000  | 0.866102000  |
| C | 0.559986000  | 0.365733000  | 1.533255000  |
| H | 3.381522000  | -0.167339000 | -0.122083000 |
| H | 2.210288000  | -1.780546000 | 1.108051000  |
| H | 1.444048000  | -2.342885000 | -0.386166000 |
| H | -0.286718000 | -1.633357000 | 1.289539000  |
| H | 2.103960000  | 1.752576000  | -1.083896000 |
| H | 1.535795000  | 2.270878000  | 1.300214000  |
| H | 0.238039000  | 0.461366000  | 2.573701000  |
| H | 2.562755000  | -0.678359000 | -1.605667000 |
| C | -0.543035000 | -0.479863000 | -0.565281000 |
| H | -0.579504000 | -1.382885000 | -1.193763000 |
| C | 0.217951000  | 0.659651000  | -1.295223000 |
| H | 0.422794000  | 0.366317000  | -2.336883000 |
| H | -0.374023000 | 1.584052000  | -1.340392000 |
| C | -1.999798000 | -0.231358000 | -0.176636000 |
| C | -2.468961000 | 1.176369000  | 0.119356000  |
| H | -1.734139000 | 1.718855000  | 0.733011000  |
| H | -2.577440000 | 1.736234000  | -0.824780000 |
| H | -3.444531000 | 1.137652000  | 0.621619000  |
| O | -2.756773000 | -1.179350000 | -0.072280000 |

**Adduct-BF<sub>3</sub>:** E= -789.648539101 (i = 0)

|   |              |              |              |
|---|--------------|--------------|--------------|
| C | -0.931067000 | -0.439066000 | -0.928112000 |
| C | -1.602410000 | -1.780671000 | -0.530085000 |
| C | -2.701506000 | -1.511224000 | 0.531238000  |
| C | -2.814428000 | 0.017472000  | 0.780550000  |
| C | -2.997536000 | 0.712935000  | -0.546709000 |
| C | -2.006353000 | 0.492603000  | -1.425108000 |
| H | -3.673995000 | -1.902719000 | 0.198038000  |
| H | -2.028715000 | -2.233003000 | -1.437678000 |
| H | -0.832724000 | -2.471550000 | -0.153312000 |
| H | -0.130342000 | -0.611672000 | -1.655945000 |
| H | -3.634046000 | 0.235769000  | 1.479582000  |
| H | -3.860725000 | 1.352069000  | -0.750540000 |
| H | -1.967119000 | 0.925952000  | -2.427686000 |
| H | -2.462275000 | -2.012048000 | 1.483065000  |
| C | -0.306222000 | 0.122014000  | 0.428322000  |
| H | 0.276429000  | -0.700757000 | 0.855002000  |
| C | -1.469078000 | 0.505413000  | 1.383758000  |
| H | -1.301549000 | 0.032839000  | 2.363382000  |
| H | -1.523833000 | 1.588218000  | 1.558483000  |
| C | 0.663170000  | 1.204825000  | 0.084622000  |
| C | 0.229467000  | 2.618678000  | -0.076501000 |
| H | -0.761462000 | 2.668984000  | -0.550306000 |
| H | 0.124130000  | 3.059853000  | 0.930271000  |
| H | 0.979670000  | 3.190027000  | -0.636481000 |
| O | 1.872299000  | 0.959491000  | -0.128727000 |
| B | 2.643714000  | -0.436915000 | 0.021137000  |
| F | 2.518478000  | -0.801762000 | 1.342583000  |
| F | 2.025088000  | -1.318581000 | -0.837953000 |
| F | 3.924809000  | -0.132011000 | -0.342808000 |

**Adduct-cat1:** E= -2073.00578966 (i = 0)

|   |              |              |             |
|---|--------------|--------------|-------------|
| C | -4.197213000 | -0.565122000 | 0.869414000 |
| C | -5.326696000 | 0.438147000  | 0.507603000 |

|   |              |              |              |
|---|--------------|--------------|--------------|
| C | -6.416354000 | -0.290231000 | -0.323070000 |
| C | -6.020676000 | -1.781672000 | -0.492026000 |
| C | -5.775978000 | -2.366034000 | 0.878699000  |
| C | -4.820761000 | -1.739590000 | 1.583601000  |
| H | -7.396319000 | -0.223526000 | 0.171241000  |
| H | -5.742454000 | 0.840124000  | 1.442957000  |
| H | -4.903538000 | 1.289754000  | -0.049342000 |
| H | -3.419861000 | -0.073710000 | 1.471763000  |
| H | -6.799253000 | -2.327460000 | -1.042744000 |
| H | -6.336222000 | -3.228808000 | 1.248004000  |
| H | -4.509708000 | -2.027149000 | 2.590781000  |
| H | -6.524766000 | 0.168025000  | -1.318851000 |
| C | -3.586809000 | -1.053446000 | -0.509253000 |
| H | -3.310659000 | -0.148920000 | -1.071009000 |
| C | -4.686138000 | -1.832792000 | -1.284507000 |
| H | -4.825308000 | -1.375984000 | -2.275644000 |
| H | -4.404747000 | -2.879575000 | -1.458906000 |
| C | -2.293248000 | -1.781483000 | -0.242949000 |
| C | -2.283844000 | -3.265625000 | -0.047593000 |
| H | -3.205106000 | -3.598670000 | 0.449490000  |
| H | -2.255346000 | -3.749030000 | -1.039652000 |
| H | -1.408331000 | -3.586110000 | 0.530729000  |
| O | -1.239859000 | -1.133147000 | -0.154998000 |
| C | 1.343684000  | 3.515230000  | 0.036588000  |
| C | -0.063204000 | 3.579522000  | -0.034514000 |
| C | -0.786087000 | 4.762206000  | -0.046884000 |
| C | -0.056966000 | 5.957139000  | 0.014646000  |
| C | 1.342479000  | 5.938025000  | 0.086207000  |
| C | 2.043860000  | 4.732905000  | 0.097978000  |
| C | 1.908675000  | 2.180467000  | 0.038759000  |
| H | -1.875078000 | 4.774508000  | -0.103247000 |
| H | -0.593433000 | 6.907961000  | 0.006300000  |
| H | 1.893691000  | 6.878932000  | 0.133738000  |
| H | 3.134497000  | 4.729252000  | 0.154646000  |
| C | 1.089037000  | 1.065538000  | -0.020558000 |
| C | 3.451088000  | -2.374552000 | 0.009514000  |
| C | 4.073410000  | -1.110411000 | 0.068961000  |
| C | 5.477582000  | -1.082290000 | 0.131758000  |
| C | 6.196125000  | -2.277067000 | 0.131374000  |
| C | 5.538490000  | -3.513083000 | 0.069160000  |
| C | 4.140054000  | -3.577838000 | 0.007056000  |
| C | 1.806598000  | -0.150664000 | -0.009168000 |
| C | 3.178134000  | 0.029243000  | 0.055469000  |
| H | 5.997953000  | -0.123285000 | 0.180440000  |
| H | 7.286174000  | -2.246906000 | 0.179906000  |
| H | 6.113596000  | -4.441089000 | 0.068522000  |
| H | 3.628387000  | -4.540137000 | -0.041402000 |
| S | 3.585726000  | 1.720248000  | 0.105505000  |
| I | 1.315213000  | -2.188543000 | -0.064265000 |
| I | -0.931220000 | 1.620691000  | -0.126932000 |

**Adduct-cat1-F2:** E= -2271.56197581 (i = 0)

|   |              |              |              |
|---|--------------|--------------|--------------|
| C | -4.379496000 | -0.803083000 | 0.932843000  |
| C | -5.548617000 | 0.176302000  | 0.637733000  |
| C | -6.646746000 | -0.560107000 | -0.174153000 |
| C | -6.215941000 | -2.034366000 | -0.398409000 |
| C | -5.907988000 | -2.647097000 | 0.947054000  |
| C | -4.946159000 | -2.012781000 | 1.635657000  |
| H | -7.609536000 | -0.535009000 | 0.356517000  |
| H | -5.941289000 | 0.540983000  | 1.597977000  |
| H | -5.168308000 | 1.053679000  | 0.091045000  |

|   |              |              |              |
|---|--------------|--------------|--------------|
| H | -3.595618000 | -0.304730000 | 1.520760000  |
| H | -6.997890000 | -2.587408000 | -0.936933000 |
| H | -6.432080000 | -3.533973000 | 1.312249000  |
| H | -4.592912000 | -2.317306000 | 2.623774000  |
| H | -6.804934000 | -0.077976000 | -1.151819000 |
| C | -3.804254000 | -1.237987000 | -0.479350000 |
| H | -3.572098000 | -0.312816000 | -1.027901000 |
| C | -4.909377000 | -2.026484000 | -1.237496000 |
| H | -5.095536000 | -1.546489000 | -2.209598000 |
| H | -4.606190000 | -3.059667000 | -1.451815000 |
| C | -2.486440000 | -1.940738000 | -0.273161000 |
| C | -2.439383000 | -3.426585000 | -0.097763000 |
| H | -3.343328000 | -3.788941000 | 0.409733000  |
| H | -2.414497000 | -3.895111000 | -1.097011000 |
| H | -1.547393000 | -3.734909000 | 0.461483000  |
| O | -1.443094000 | -1.271283000 | -0.215645000 |
| C | 1.036145000  | 3.419317000  | 0.024488000  |
| C | -0.371355000 | 3.451381000  | -0.069815000 |
| C | -1.113780000 | 4.624284000  | -0.087231000 |
| C | -0.418771000 | 5.834083000  | -0.009565000 |
| C | 0.976600000  | 5.820586000  | 0.082560000  |
| C | 1.718114000  | 4.643217000  | 0.102531000  |
| C | 1.629434000  | 2.096469000  | 0.029784000  |
| H | -0.946704000 | 6.788682000  | -0.020475000 |
| H | 2.805653000  | 4.690774000  | 0.176653000  |
| C | 0.831517000  | 0.966980000  | -0.051204000 |
| C | 3.253137000  | -2.424699000 | -0.017701000 |
| C | 3.853576000  | -1.151271000 | 0.079670000  |
| C | 5.251499000  | -1.088428000 | 0.184095000  |
| C | 5.973391000  | -2.277780000 | 0.180679000  |
| C | 5.363074000  | -3.531829000 | 0.077739000  |
| C | 3.971400000  | -3.613368000 | -0.022488000 |
| C | 1.571999000  | -0.234317000 | -0.033998000 |
| C | 2.938310000  | -0.027057000 | 0.058942000  |
| H | 5.778957000  | -0.136919000 | 0.268030000  |
| H | 5.980575000  | -4.431199000 | 0.078419000  |
| S | 3.312554000  | 1.669876000  | 0.125293000  |
| I | 1.120844000  | -2.278109000 | -0.133712000 |
| I | -1.196780000 | 1.481112000  | -0.187957000 |
| F | 7.299940000  | -2.217730000 | 0.279572000  |
| F | 1.623251000  | 6.982218000  | 0.154078000  |
| H | -2.201736000 | 4.620113000  | -0.162024000 |
| H | 3.485337000  | -4.586923000 | -0.101592000 |

**Adduct-cat1-F4:** E= -2470.11059602 (i = 0)

|   |              |              |              |
|---|--------------|--------------|--------------|
| C | -4.242439000 | -1.734278000 | 1.015845000  |
| C | -5.540849000 | -0.944505000 | 0.692586000  |
| C | -6.405435000 | -1.763853000 | -0.302216000 |
| C | -5.717691000 | -3.127748000 | -0.581313000 |
| C | -5.428342000 | -3.797947000 | 0.739887000  |
| C | -4.644913000 | -3.081936000 | 1.561630000  |
| H | -7.412187000 | -1.936713000 | 0.104596000  |
| H | -6.078779000 | -0.768410000 | 1.635258000  |
| H | -5.281646000 | 0.043952000  | 0.280324000  |
| H | -3.609759000 | -1.168376000 | 1.714332000  |
| H | -6.344472000 | -3.750193000 | -1.234730000 |
| H | -5.821885000 | -4.787677000 | 0.984794000  |
| H | -4.327507000 | -3.413814000 | 2.552925000  |
| H | -6.531968000 | -1.223723000 | -1.253988000 |
| C | -3.501344000 | -1.910202000 | -0.376477000 |
| H | -3.457662000 | -0.913406000 | -0.836533000 |

|   |              |              |              |
|---|--------------|--------------|--------------|
| C | -4.358544000 | -2.846729000 | -1.277321000 |
| H | -4.525518000 | -2.360123000 | -2.249579000 |
| H | -3.849135000 | -3.798155000 | -1.482831000 |
| C | -2.077552000 | -2.336407000 | -0.152254000 |
| C | -1.748382000 | -3.773946000 | 0.105718000  |
| H | -2.605183000 | -4.313515000 | 0.528701000  |
| H | -1.499518000 | -4.250294000 | -0.858970000 |
| H | -0.881763000 | -3.862965000 | 0.774646000  |
| O | -1.170880000 | -1.484812000 | -0.156264000 |
| C | 0.372895000  | 3.572165000  | 0.040974000  |
| C | -1.008277000 | 3.309025000  | -0.060869000 |
| C | -1.953808000 | 4.326478000  | -0.076526000 |
| C | -1.539163000 | 5.651511000  | 0.010977000  |
| C | -0.168519000 | 5.909599000  | 0.115117000  |
| C | 0.797357000  | 4.904828000  | 0.132631000  |
| C | 1.206150000  | 2.384415000  | 0.040328000  |
| H | -2.266514000 | 6.463953000  | 0.000114000  |
| H | 1.851724000  | 5.170314000  | 0.218832000  |
| C | 0.630994000  | 1.126192000  | -0.040139000 |
| C | 3.603493000  | -1.747979000 | -0.018251000 |
| C | 3.993462000  | -0.395021000 | 0.058741000  |
| C | 5.360426000  | -0.092777000 | 0.134430000  |
| C | 6.272203000  | -1.147180000 | 0.130540000  |
| C | 5.888790000  | -2.489588000 | 0.054028000  |
| C | 4.530925000  | -2.782113000 | -0.021028000 |
| C | 1.580775000  | 0.083739000  | -0.032479000 |
| C | 2.886100000  | 0.542787000  | 0.047383000  |
| H | 5.724328000  | 0.933432000  | 0.195987000  |
| H | 6.630663000  | -3.288865000 | 0.053202000  |
| S | 2.938435000  | 2.278601000  | 0.120144000  |
| I | 1.497910000  | -2.013012000 | -0.103959000 |
| I | -1.461476000 | 1.239891000  | -0.173029000 |
| F | 7.569073000  | -0.867547000 | 0.203211000  |
| F | 0.228091000  | 7.174479000  | 0.203036000  |
| F | -3.244353000 | 4.021881000  | -0.174325000 |
| F | 4.111408000  | -4.041069000 | -0.095318000 |

**Adduct-cat1-F8:** E= -2867.17478539 (i = 0)

|   |              |              |              |
|---|--------------|--------------|--------------|
| C | -4.162707000 | -2.657628000 | 0.914901000  |
| C | -5.560115000 | -2.103507000 | 0.520606000  |
| C | -6.219245000 | -3.059522000 | -0.508711000 |
| C | -5.293367000 | -4.284158000 | -0.741118000 |
| C | -4.959444000 | -4.894910000 | 0.598214000  |
| C | -4.353465000 | -4.054714000 | 1.451807000  |
| H | -7.200623000 | -3.402831000 | -0.151157000 |
| H | -6.165922000 | -2.024604000 | 1.434801000  |
| H | -5.457918000 | -1.084588000 | 0.113681000  |
| H | -3.672463000 | -1.991493000 | 1.638894000  |
| H | -5.769421000 | -5.005359000 | -1.419571000 |
| H | -5.188082000 | -5.937843000 | 0.831591000  |
| H | -4.033003000 | -4.326506000 | 2.460269000  |
| H | -6.387437000 | -2.548498000 | -1.470040000 |
| C | -3.330388000 | -2.705253000 | -0.436874000 |
| H | -3.428573000 | -1.714881000 | -0.902655000 |
| C | -3.970307000 | -3.772752000 | -1.372176000 |
| H | -4.171686000 | -3.318222000 | -2.353335000 |
| H | -3.297099000 | -4.622353000 | -1.549323000 |
| C | -1.871528000 | -2.884433000 | -0.129746000 |
| C | -1.313874000 | -4.248794000 | 0.122108000  |
| H | -2.086025000 | -4.926124000 | 0.509230000  |
| H | -0.963248000 | -4.665408000 | -0.838312000 |

|   |              |              |              |
|---|--------------|--------------|--------------|
| H | -0.465930000 | -4.207750000 | 0.818230000  |
| O | -1.128741000 | -1.886501000 | -0.055904000 |
| C | -0.452518000 | 3.326701000  | 0.001398000  |
| C | -1.779917000 | 2.851021000  | -0.006957000 |
| C | -2.879702000 | 3.693400000  | -0.005002000 |
| C | -2.659012000 | 5.077968000  | 0.008024000  |
| C | -1.351184000 | 5.582357000  | 0.017037000  |
| C | -0.257905000 | 4.712671000  | 0.013432000  |
| C | 0.574105000  | 2.308213000  | -0.002238000 |
| C | 0.209539000  | 0.970884000  | -0.012747000 |
| C | 3.610257000  | -1.389338000 | -0.001868000 |
| C | 3.761985000  | 0.012626000  | 0.002490000  |
| C | 5.064045000  | 0.526142000  | 0.006537000  |
| C | 6.165403000  | -0.333580000 | 0.005686000  |
| C | 5.980905000  | -1.723292000 | 0.001141000  |
| C | 4.686269000  | -2.261466000 | -0.002293000 |
| C | 1.316647000  | 0.100617000  | -0.008579000 |
| C | 2.530208000  | 0.770889000  | 0.000392000  |
| S | 2.303703000  | 2.495911000  | 0.008535000  |
| I | 1.569053000  | -1.982868000 | -0.002348000 |
| I | -1.876615000 | 0.727356000  | -0.034865000 |
| F | 7.389502000  | 0.160671000  | 0.008854000  |
| F | -1.157386000 | 6.888085000  | 0.029107000  |
| F | -4.116619000 | 3.218421000  | -0.014971000 |
| F | 4.513106000  | -3.575355000 | -0.006060000 |
| F | 5.256539000  | 1.840023000  | 0.010847000  |
| F | 7.029549000  | -2.525107000 | -0.000080000 |
| F | -3.683437000 | 5.910363000  | 0.011727000  |
| F | 0.974388000  | 5.206809000  | 0.021448000  |

**Adduct-cat1-NMe<sub>2</sub>:** E= -2341.07499921 (i = 0)

|   |              |              |              |
|---|--------------|--------------|--------------|
| C | -4.839582000 | -1.292458000 | 0.942548000  |
| C | -6.033907000 | -0.351694000 | 0.624259000  |
| C | -7.090323000 | -1.124767000 | -0.209063000 |
| C | -6.608853000 | -2.585627000 | -0.419634000 |
| C | -6.307538000 | -3.185296000 | 0.933086000  |
| C | -5.379525000 | -2.518935000 | 1.637668000  |
| H | -8.065021000 | -1.128813000 | 0.300134000  |
| H | -6.458260000 | 0.000988000  | 1.575542000  |
| H | -5.670952000 | 0.537339000  | 0.083717000  |
| H | -4.082855000 | -0.768866000 | 1.543998000  |
| H | -7.362561000 | -3.164370000 | -0.971427000 |
| H | -6.809137000 | -4.088471000 | 1.290003000  |
| H | -5.034820000 | -2.810489000 | 2.632743000  |
| H | -7.241960000 | -0.650294000 | -1.191553000 |
| C | -4.225273000 | -1.708199000 | -0.457400000 |
| H | -4.020126000 | -0.775326000 | -1.002949000 |
| C | -5.286187000 | -2.539468000 | -1.232093000 |
| H | -5.468483000 | -2.074394000 | -2.212330000 |
| H | -4.943479000 | -3.563779000 | -1.429761000 |
| C | -2.880322000 | -2.354933000 | -0.233199000 |
| C | -2.772339000 | -3.837688000 | -0.046270000 |
| H | -3.666467000 | -4.236968000 | 0.451060000  |
| H | -2.711754000 | -4.311068000 | -1.041666000 |
| H | -1.874087000 | -4.100116000 | 0.526366000  |
| O | -1.869246000 | -1.642327000 | -0.173116000 |
| C | 0.415774000  | 3.185444000  | -0.008280000 |
| C | -0.991941000 | 3.144209000  | -0.081647000 |
| C | -1.766729000 | 4.297435000  | -0.100548000 |
| C | -1.122225000 | 5.529476000  | -0.046586000 |
| C | 0.300625000  | 5.635396000  | 0.028306000  |

|   |              |              |              |
|---|--------------|--------------|--------------|
| C | 1.051989000  | 4.428444000  | 0.046985000  |
| C | 1.067623000  | 1.888391000  | -0.000330000 |
| H | -2.855642000 | 4.261750000  | -0.158954000 |
| H | -1.741682000 | 6.423743000  | -0.063926000 |
| H | 2.138694000  | 4.449679000  | 0.105902000  |
| C | 0.326324000  | 0.720565000  | -0.059083000 |
| C | 2.905042000  | -2.552538000 | -0.047683000 |
| C | 3.453485000  | -1.255143000 | 0.018384000  |
| C | 4.842160000  | -1.112454000 | 0.081173000  |
| C | 5.694226000  | -2.250589000 | 0.080656000  |
| C | 5.079957000  | -3.538999000 | 0.011529000  |
| C | 3.698354000  | -3.693328000 | -0.051288000 |
| C | 1.124314000  | -0.445470000 | -0.051600000 |
| C | 2.481040000  | -0.177181000 | 0.010880000  |
| H | 5.255105000  | -0.106623000 | 0.131695000  |
| H | 5.688796000  | -4.440845000 | 0.006450000  |
| H | 3.269218000  | -4.695946000 | -0.101237000 |
| S | 2.771854000  | 1.538373000  | 0.066040000  |
| I | 0.771828000  | -2.511750000 | -0.118373000 |
| I | -1.726650000 | 1.139816000  | -0.165955000 |
| N | 7.051228000  | -2.117279000 | 0.144777000  |
| C | 7.905683000  | -3.295723000 | 0.146446000  |
| H | 7.696248000  | -3.951894000 | 1.009024000  |
| H | 7.784634000  | -3.890816000 | -0.775359000 |
| H | 8.953836000  | -2.982364000 | 0.209427000  |
| N | 0.916402000  | 6.852452000  | 0.079390000  |
| C | 2.367393000  | 6.933037000  | 0.145998000  |
| H | 2.763456000  | 6.441473000  | 1.051948000  |
| H | 2.844160000  | 6.465779000  | -0.733667000 |
| H | 2.672496000  | 7.985159000  | 0.173833000  |
| C | 7.651712000  | -0.793972000 | 0.210345000  |
| H | 7.324479000  | -0.239785000 | 1.107581000  |
| H | 8.742370000  | -0.891304000 | 0.254627000  |
| H | 7.402143000  | -0.186563000 | -0.677463000 |
| C | 0.128431000  | 8.076290000  | 0.056641000  |
| H | -0.464374000 | 8.165208000  | -0.870413000 |
| H | -0.564416000 | 8.133370000  | 0.914072000  |
| H | 0.800589000  | 8.940173000  | 0.109880000  |

**Adduct-cat1-NO<sub>2</sub>:** E= -2482.17579020 (i = 0)

|   |              |              |              |
|---|--------------|--------------|--------------|
| C | -4.747508000 | -1.280428000 | 0.956879000  |
| C | -5.957719000 | -0.370442000 | 0.609369000  |
| C | -6.982568000 | -1.176139000 | -0.232246000 |
| C | -6.466977000 | -2.628823000 | -0.416343000 |
| C | -6.173356000 | -3.204962000 | 0.947975000  |
| C | -5.270174000 | -2.510657000 | 1.657790000  |
| H | -7.965495000 | -1.194856000 | 0.260207000  |
| H | -6.404093000 | -0.019147000 | 1.550876000  |
| H | -5.607506000 | 0.521790000  | 0.065541000  |
| H | -4.011438000 | -0.733377000 | 1.563095000  |
| H | -7.199050000 | -3.230617000 | -0.972286000 |
| H | -6.660711000 | -4.114216000 | 1.308896000  |
| H | -4.933795000 | -2.782423000 | 2.661164000  |
| H | -7.126897000 | -0.716846000 | -1.222830000 |
| C | -4.105562000 | -1.693676000 | -0.433970000 |
| H | -3.924799000 | -0.761960000 | -0.989308000 |
| C | -5.133749000 | -2.565472000 | -1.210191000 |
| H | -5.310221000 | -2.121327000 | -2.201031000 |
| H | -4.761737000 | -3.584048000 | -1.383521000 |
| C | -2.751033000 | -2.302767000 | -0.192740000 |
| C | -2.608949000 | -3.771064000 | 0.062324000  |

|   |              |              |              |
|---|--------------|--------------|--------------|
| H | -3.523141000 | -4.189879000 | 0.501702000  |
| H | -2.442916000 | -4.274730000 | -0.906532000 |
| H | -1.751692000 | -3.976304000 | 0.717267000  |
| O | -1.746783000 | -1.570123000 | -0.177492000 |
| C | 0.458789000  | 3.230614000  | 0.001599000  |
| C | -0.949256000 | 3.191919000  | -0.100036000 |
| C | -1.754886000 | 4.321809000  | -0.135670000 |
| C | -1.124354000 | 5.567775000  | -0.065666000 |
| C | 0.267845000  | 5.622048000  | 0.036571000  |
| C | 1.073062000  | 4.488908000  | 0.071929000  |
| C | 1.123575000  | 1.942174000  | 0.017382000  |
| H | -2.840562000 | 4.263585000  | -0.218092000 |
| H | -1.703988000 | 6.489827000  | -0.090353000 |
| H | 2.154750000  | 4.593472000  | 0.153658000  |
| C | 0.384574000  | 0.773473000  | -0.058406000 |
| C | 2.973870000  | -2.489214000 | -0.057681000 |
| C | 3.511007000  | -1.186157000 | 0.033240000  |
| C | 4.905760000  | -1.059719000 | 0.108016000  |
| C | 5.676751000  | -2.217065000 | 0.088268000  |
| C | 5.130263000  | -3.499787000 | -0.001771000 |
| C | 3.741856000  | -3.645549000 | -0.076281000 |
| C | 1.186969000  | -0.386197000 | -0.047800000 |
| C | 2.541249000  | -0.107264000 | 0.032225000  |
| H | 5.390710000  | -0.086082000 | 0.179540000  |
| H | 5.786247000  | -4.369395000 | -0.012939000 |
| H | 3.297886000  | -4.639922000 | -0.145845000 |
| S | 2.826763000  | 1.605944000  | 0.105021000  |
| I | 0.835525000  | -2.448316000 | -0.142226000 |
| I | -1.667907000 | 1.175345000  | -0.196488000 |
| N | 7.153245000  | -2.076966000 | 0.166724000  |
| O | 7.814473000  | -3.099597000 | 0.161930000  |
| O | 7.606823000  | -0.947627000 | 0.230324000  |
| N | 0.925329000  | 6.951739000  | 0.110864000  |
| O | 2.139724000  | 6.971886000  | 0.211298000  |
| O | 0.208214000  | 7.934877000  | 0.066510000  |

**Adduct-cat2'**: E= -2466.01501144 (i = 0)

|   |             |              |              |
|---|-------------|--------------|--------------|
| C | 1.831774000 | -2.366238000 | 1.207085000  |
| C | 1.186283000 | -2.484098000 | 2.611029000  |
| C | 1.891681000 | -3.616287000 | 3.403297000  |
| C | 3.031315000 | -4.217807000 | 2.535121000  |
| C | 3.935998000 | -3.093727000 | 2.087865000  |
| C | 3.312530000 | -2.135002000 | 1.384920000  |
| H | 2.309920000 | -3.235079000 | 4.346619000  |
| H | 1.284553000 | -1.514390000 | 3.121097000  |
| H | 0.107326000 | -2.678619000 | 2.499371000  |
| H | 1.349164000 | -1.567144000 | 0.635028000  |
| H | 3.576384000 | -4.989781000 | 3.096365000  |
| H | 5.004804000 | -3.084652000 | 2.317697000  |
| H | 3.807943000 | -1.252722000 | 0.972188000  |
| H | 1.181329000 | -4.416496000 | 3.666027000  |
| C | 1.605093000 | -3.752780000 | 0.487227000  |
| H | 0.524661000 | -3.954351000 | 0.541360000  |
| C | 2.387757000 | -4.842673000 | 1.266197000  |
| H | 1.702833000 | -5.652200000 | 1.561363000  |
| H | 3.173699000 | -5.302634000 | 0.653064000  |
| C | 1.904014000 | -3.570503000 | -0.989480000 |
| C | 3.231419000 | -3.983214000 | -1.558246000 |
| H | 4.048741000 | -3.646362000 | -0.902195000 |
| H | 3.285903000 | -5.083870000 | -1.599065000 |
| H | 3.346445000 | -3.578505000 | -2.571816000 |



|   |              |              |              |
|---|--------------|--------------|--------------|
| O | 1.074936000  | -3.022508000 | -1.714402000 |
| H | -3.433520000 | 1.448406000  | -2.723541000 |
| C | -2.505113000 | 1.744679000  | -2.233400000 |
| C | -0.128155000 | 2.406171000  | -0.966943000 |
| C | -2.231116000 | 1.245767000  | -0.955538000 |
| C | -1.600525000 | 2.590252000  | -2.869861000 |
| C | -0.398369000 | 2.908971000  | -2.239409000 |
| C | -1.048751000 | 1.591937000  | -0.276824000 |
| H | -1.818844000 | 2.979741000  | -3.865138000 |
| H | 0.345324000  | 3.537767000  | -2.731186000 |
| N | 1.146765000  | 2.713663000  | -0.381881000 |
| N | -3.191396000 | 0.342314000  | -0.394525000 |
| C | -3.081370000 | -1.011194000 | -0.374622000 |
| N | -4.176962000 | -1.529317000 | 0.199949000  |
| C | -4.404515000 | 0.710517000  | 0.194747000  |
| C | -5.032060000 | -0.487296000 | 0.570621000  |
| C | 2.287356000  | 2.000458000  | -0.569033000 |
| N | 3.293137000  | 2.581627000  | 0.099791000  |
| C | 1.435738000  | 3.813575000  | 0.433563000  |
| C | 2.800811000  | 3.721028000  | 0.744315000  |
| C | -4.478390000 | -2.937545000 | 0.442878000  |
| H | -5.418484000 | -3.197111000 | -0.062121000 |
| H | -3.668754000 | -3.562043000 | 0.051632000  |
| H | -4.581283000 | -3.102344000 | 1.524218000  |
| C | 4.682976000  | 2.139592000  | 0.201527000  |
| H | 4.879135000  | 1.795495000  | 1.226516000  |
| H | 4.864451000  | 1.322557000  | -0.504444000 |
| H | 5.342484000  | 2.982575000  | -0.041893000 |
| C | -6.280066000 | -0.496042000 | 1.200108000  |
| C | -4.985120000 | 1.958420000  | 0.431116000  |
| C | 0.633101000  | 4.851421000  | 0.911102000  |
| C | 3.433715000  | 4.664840000  | 1.559581000  |
| H | -6.770162000 | -1.425241000 | 1.491452000  |
| H | -4.488786000 | 2.884341000  | 0.138774000  |
| H | 4.493083000  | 4.593786000  | 1.806119000  |
| H | -0.427379000 | 4.912011000  | 0.666557000  |
| C | -6.864632000 | 0.747470000  | 1.436741000  |
| C | -6.229000000 | 1.951161000  | 1.061093000  |
| C | 1.263035000  | 5.793691000  | 1.720898000  |
| C | 2.636437000  | 5.701541000  | 2.039861000  |
| H | -7.838925000 | 0.791966000  | 1.927287000  |
| H | -6.724638000 | 2.901326000  | 1.269642000  |
| H | 3.084918000  | 6.463505000  | 2.680148000  |
| H | 0.679717000  | 6.625180000  | 2.121113000  |
| C | -0.740046000 | 1.190573000  | 1.162855000  |
| I | -1.357046000 | -2.024251000 | -1.028159000 |
| I | 2.387044000  | 0.288088000  | -1.739074000 |
| F | -0.688083000 | 2.282747000  | 1.940421000  |
| F | 0.458993000  | 0.580231000  | 1.254726000  |
| F | -1.639255000 | 0.361201000  | 1.698261000  |
